# Supplementary material for: Synthesis, structure and properties of [Co(NCS)2(4-(4-chlorobenzyl)pyridine)2]n, that shows slow magnetic relaxations and a metamagnetic transition
Source: Royal Society of Chemistry journal article supplement (doi:10.1039/c5dt01898f), 2015-01-01
Supplement: c5dt01898f1.pdf [file c5dt01898f1.pdf]

# Synthesis, Structure and Properties of [Co(NCS)<sub>2</sub>(4-(4-Chlorobenzyl)pyridine)<sub>2</sub>]<sub>n</sub>, that shows Slow Magnetic Relaxations and a Metamagnetic Transition

Julia Werner, Zbigniew Tomkowicz, Michał Rams, Stefan G. Ebbinghaus, Tristan Neumann and Christian Näther

## Content

|            |                                                                                                                                                              |   |
|------------|--------------------------------------------------------------------------------------------------------------------------------------------------------------|---|
| Figure S1  | IR spectra of <b>1</b> . The CN stretching vibration is given.                                                                                               | 2 |
| Figure S2  | IR spectra of <b>2</b> . The CN stretching vibration is given.                                                                                               | 2 |
| Figure S3  | DTG, TG and DTA curves for <b>1</b> . Heating rate = 2 °C/min. Given are the mass change in % and the peak temperature in <i>TP</i> in °C.                   | 3 |
| Table S 1  | Selected bond length (Å) and angles (°) for <b>1</b> .                                                                                                       | 4 |
| Figure S4  | ORTEP plot of <b>1</b> with labelling and displacement ellipsoids drawn at 50 % probability level. Symmetry transformation used to generate equivalent atoms | 4 |
| Table S2   | Selected bond length (Å) and angles (°) for <b>2</b> .                                                                                                       | 5 |
| Figure S5  | ORTEP plot of <b>2</b> with labelling and displacement ellipsoids drawn at 50 % probability level. Symmetry transformation used to generate equivalent atoms | 5 |
| Figure S6  | Experimental and calculated x-ray powder pattern for compound <b>1</b> .                                                                                     | 6 |
| Figure S7  | Experimental and calculated x-ray powder pattern for compound <b>2</b> .                                                                                     | 6 |
| Figure S8  | SEM images of the crystals of compound <b>2</b> .                                                                                                            | 7 |
| Figure S9  | Temperature dependence of $\chi T$ vs. $T$ (bottom) for <b>1</b> .                                                                                           | 8 |
| Figure S10 | $\ln(\chi T)$ vs. $1/T$ dependence for compound <b>2</b> .                                                                                                   | 8 |
| Figure S11 | Comparison of $\chi(T)$ curves registered in FC and ZFC regimes for compound <b>2</b> .                                                                      | 9 |
| Table S3   | Fitting results of the AC data for compound <b>2</b> .                                                                                                       | 9 |

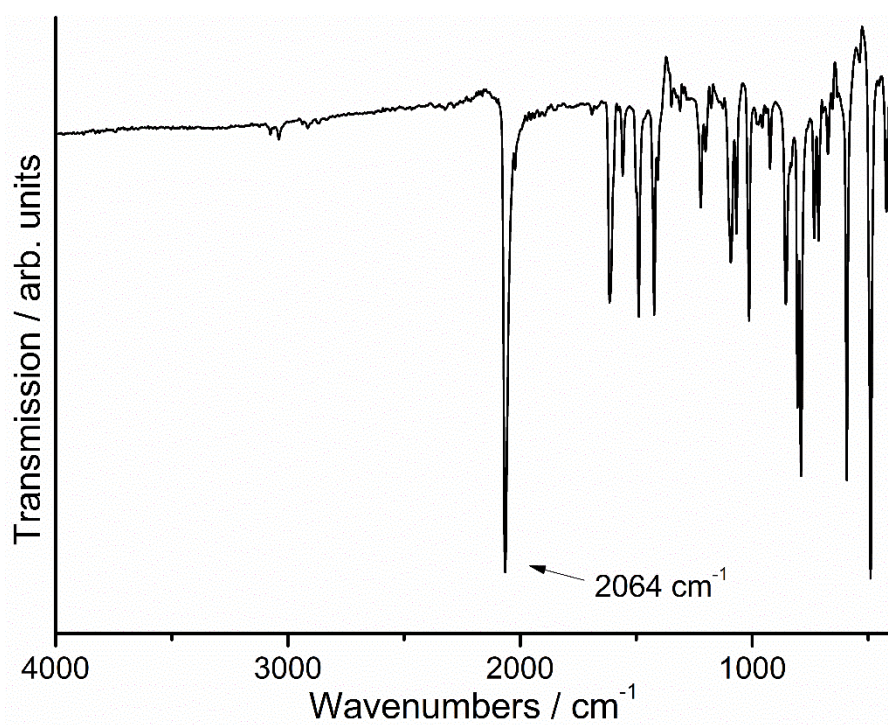

Figure S1: IR spectra of **1**. The CN stretching vibration is given.

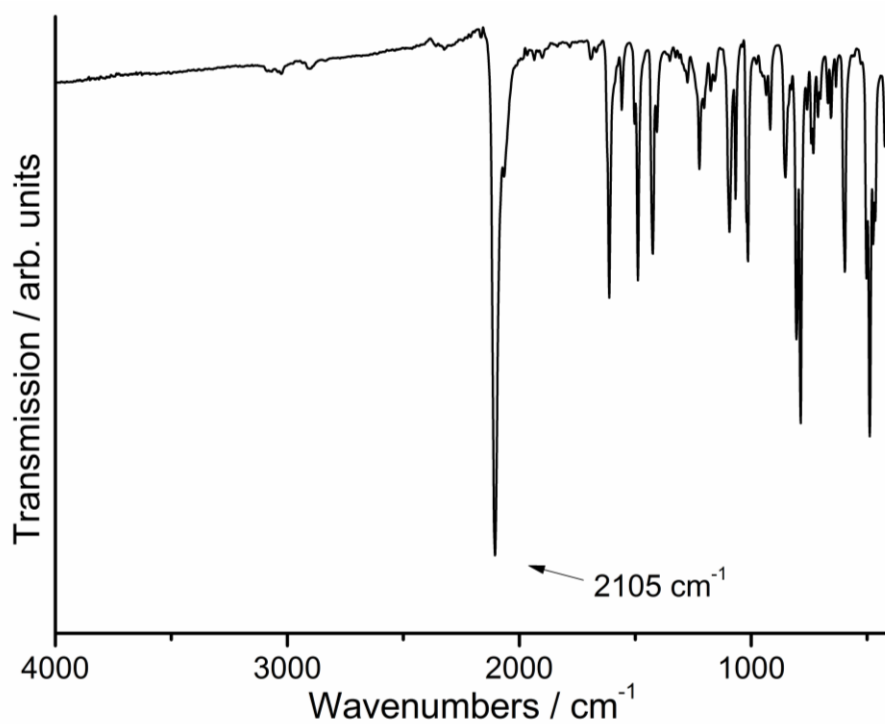

Figure S2: IR spectra of **2**. The CN stretching vibration is given.

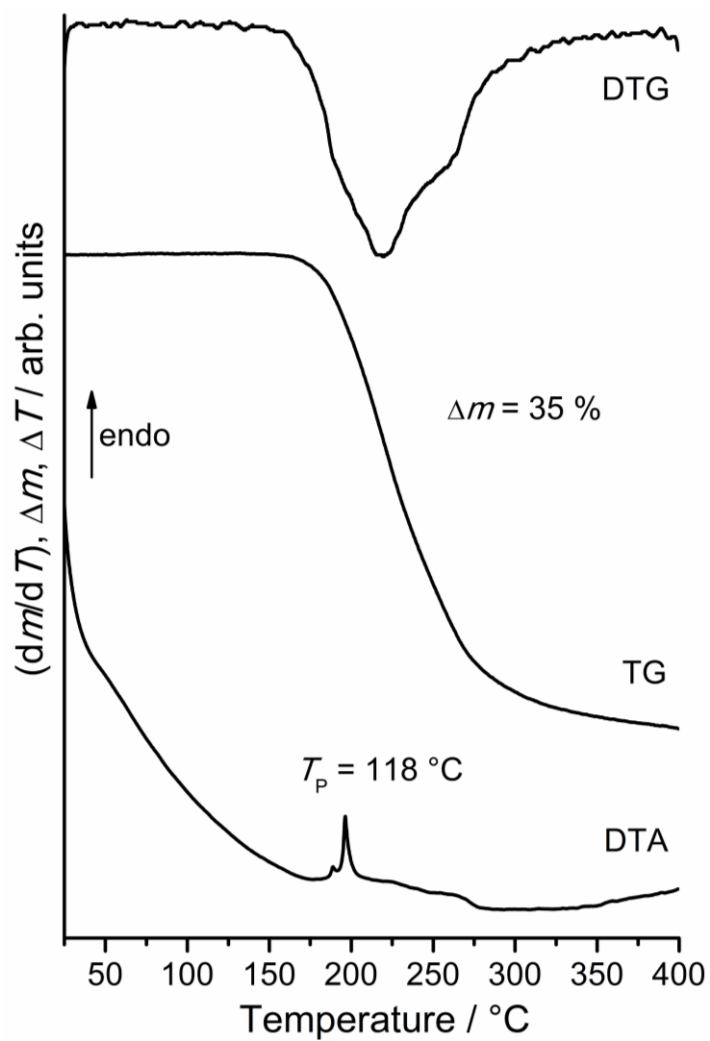

Figure S3. DTG, TG and DTA curves for **1**. Heating rate = 2 °C/min. Given are the mass change in % and the peak temperature in  $T_p$  in °C.

Table S 1: Selected bond length (Å) and angles (°) for **1**.

|                   |            |                    |            |
|-------------------|------------|--------------------|------------|
| Co(1)-N(1)        | 2.0943(15) | Co(1)-N(31)        | 2.2412(15) |
| Co(1)-N(11)       | 2.1641(15) | N(11)-Co(1)-N(11A) | 180.00(5)  |
| N(1)-Co(1)-N(1A)  | 180.00(8)  | N(1)-Co(1)-N(31A)  | 88.66(6)   |
| N(1)-Co(1)-N(11)  | 89.21(6)   | N(11)-Co(1)-N(31)  | 90.35(6)   |
| N(1)-Co(1)-N(11A) | 90.79(6)   | N(11)-Co(1)-N(31A) | 89.65(6)   |
| N(1)-Co(1)-N(31)  | 91.34(6)   |                    |            |

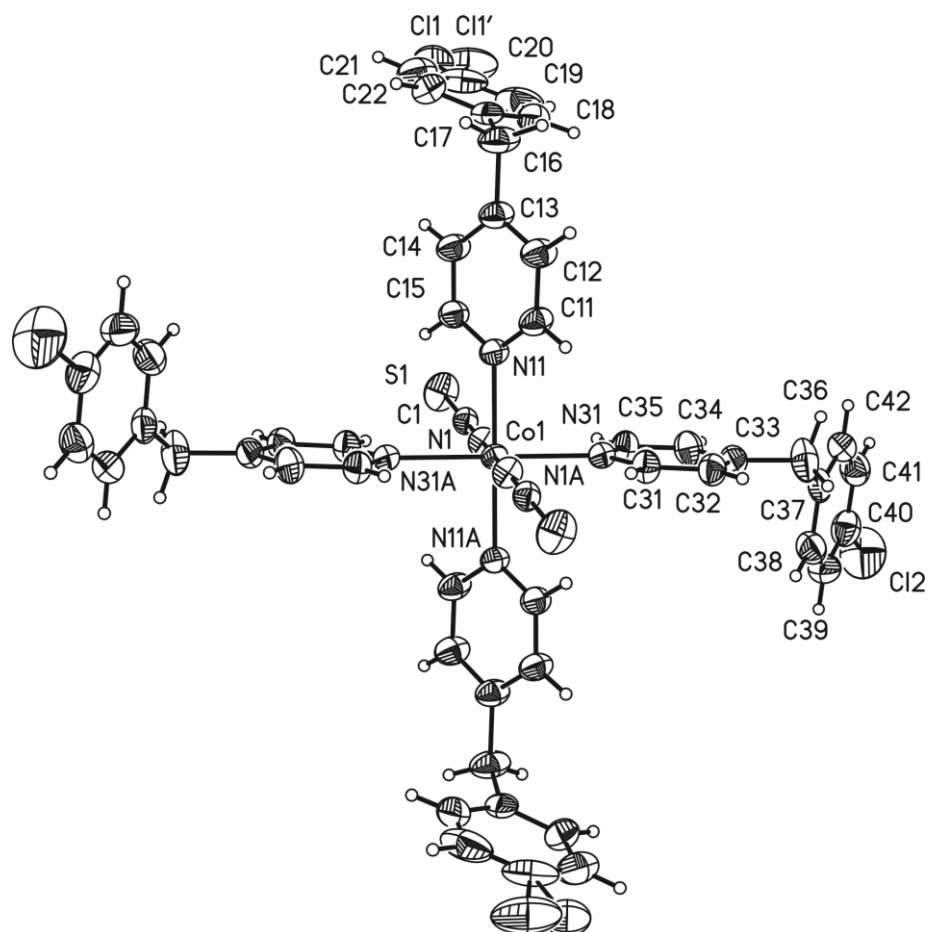

Figure S4: ORTEP plot of **1** with labelling and displacement ellipsoids drawn at 50 % probability level. Symmetry transformation used to generate equivalent atoms: A:  $-x+3/2, -y+1/2, -z+1$ .

Table S2: Selected bond length (Å) and angles (°) for **2**.

|                   |            |                    |            |
|-------------------|------------|--------------------|------------|
| Co(1)-N(2)        | 2.060(2)   | Co(2)-N(1A)        | 2.066(2)   |
| Co(1)-S(1)        | 2.5694(10) | Co(2)-S(2)         | 2.6066(10) |
| Co(1)-N(11)       | 2.165(2)   | Co(2)-N(31)        | 2.145(2)   |
| N(2)-Co(1)-N(2A)  | 180.00(9)  | N(1B)-Co(2)-N(1A)  | 180.00(9)  |
| N(2)-Co(1)-N(11)  | 89.93(8)   | N(1A)-Co(2)-N(31)  | 89.83(8)   |
| N(2)-Co(1)-N(11A) | 90.07(8)   | N(1A)-Co(2)-N(31C) | 90.17(8)   |
| N(2)-Co(1)-S(1)   | 86.73(6)   | N(1A)-Co(2)-S(2)   | 94.23(6)   |
| N(2)-Co(1)-S(1A)  | 93.27(6)   | N(1A)-Co(2)-S(2C)  | 85.77(6)   |

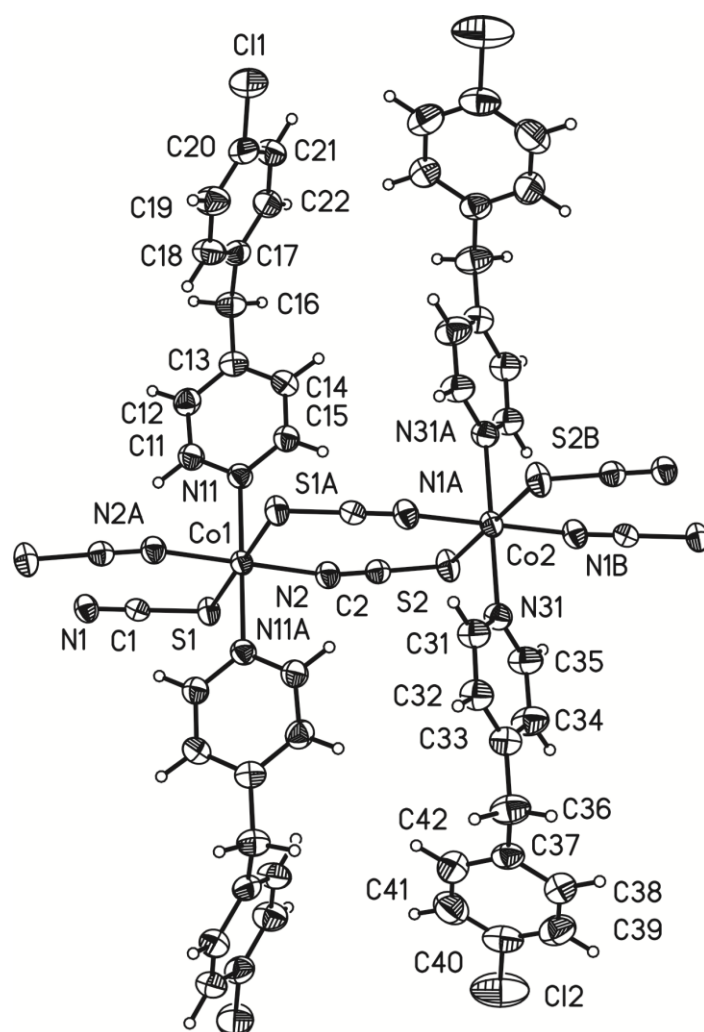

Figure S5: ORTEP plot of **2** with labelling and displacement ellipsoids drawn at 50 % probability level. Symmetry transformation used to generate equivalent atoms: A:  $-x+1, -y+1, -z+1$ , B:  $x-1, y+1, z$ , C:  $-x, -y+2, -z+1$ , D:  $x+1, y-1, z$ .

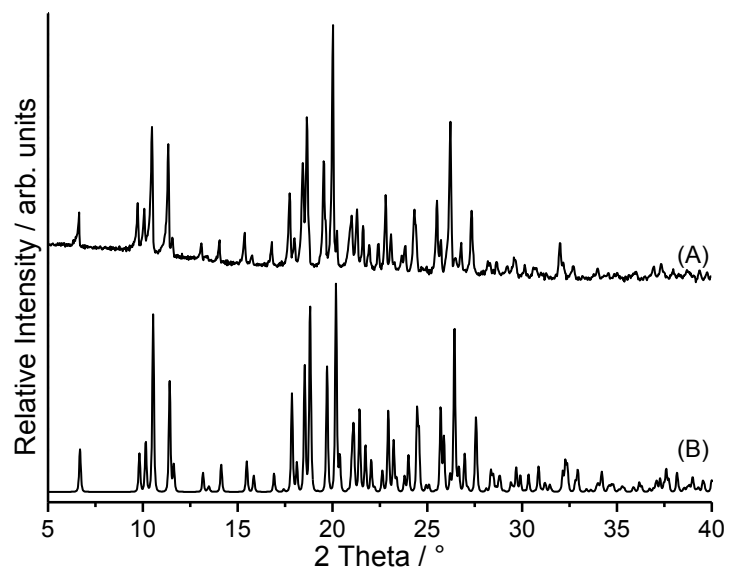

Figure S6: Experimental (top) and calculated (bottom) x-ray powder pattern for compound **1**.

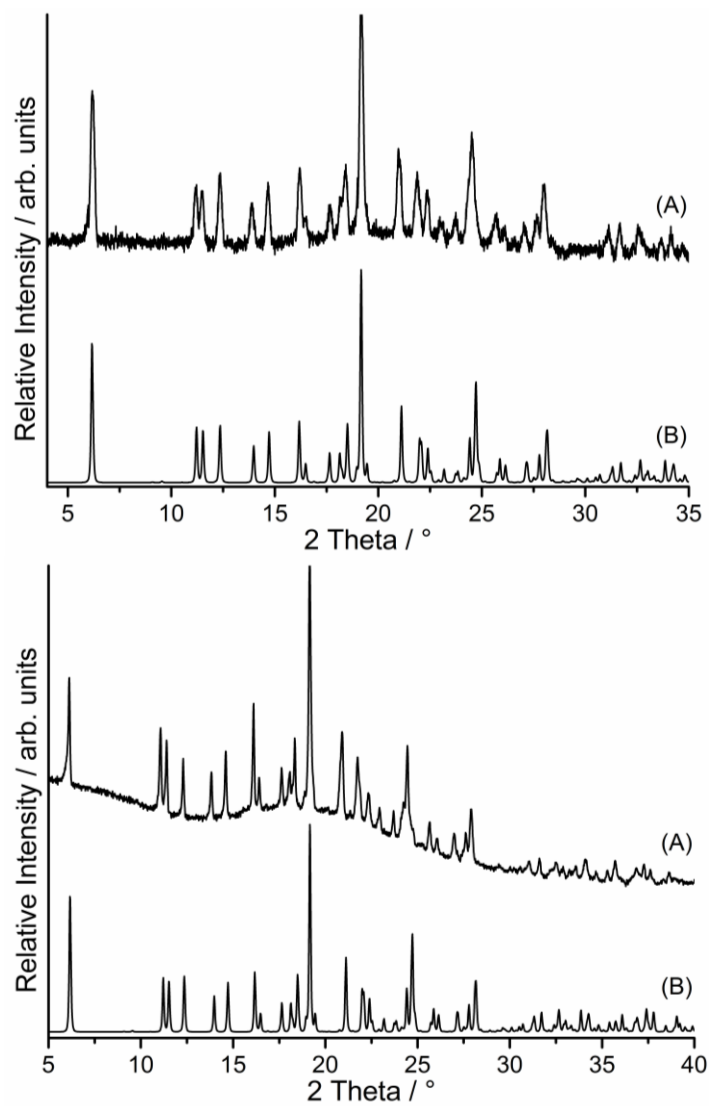

Figure S7: Experimental (top) and calculated (bottom) x-ray powder patterns for two samples of compound **2**.

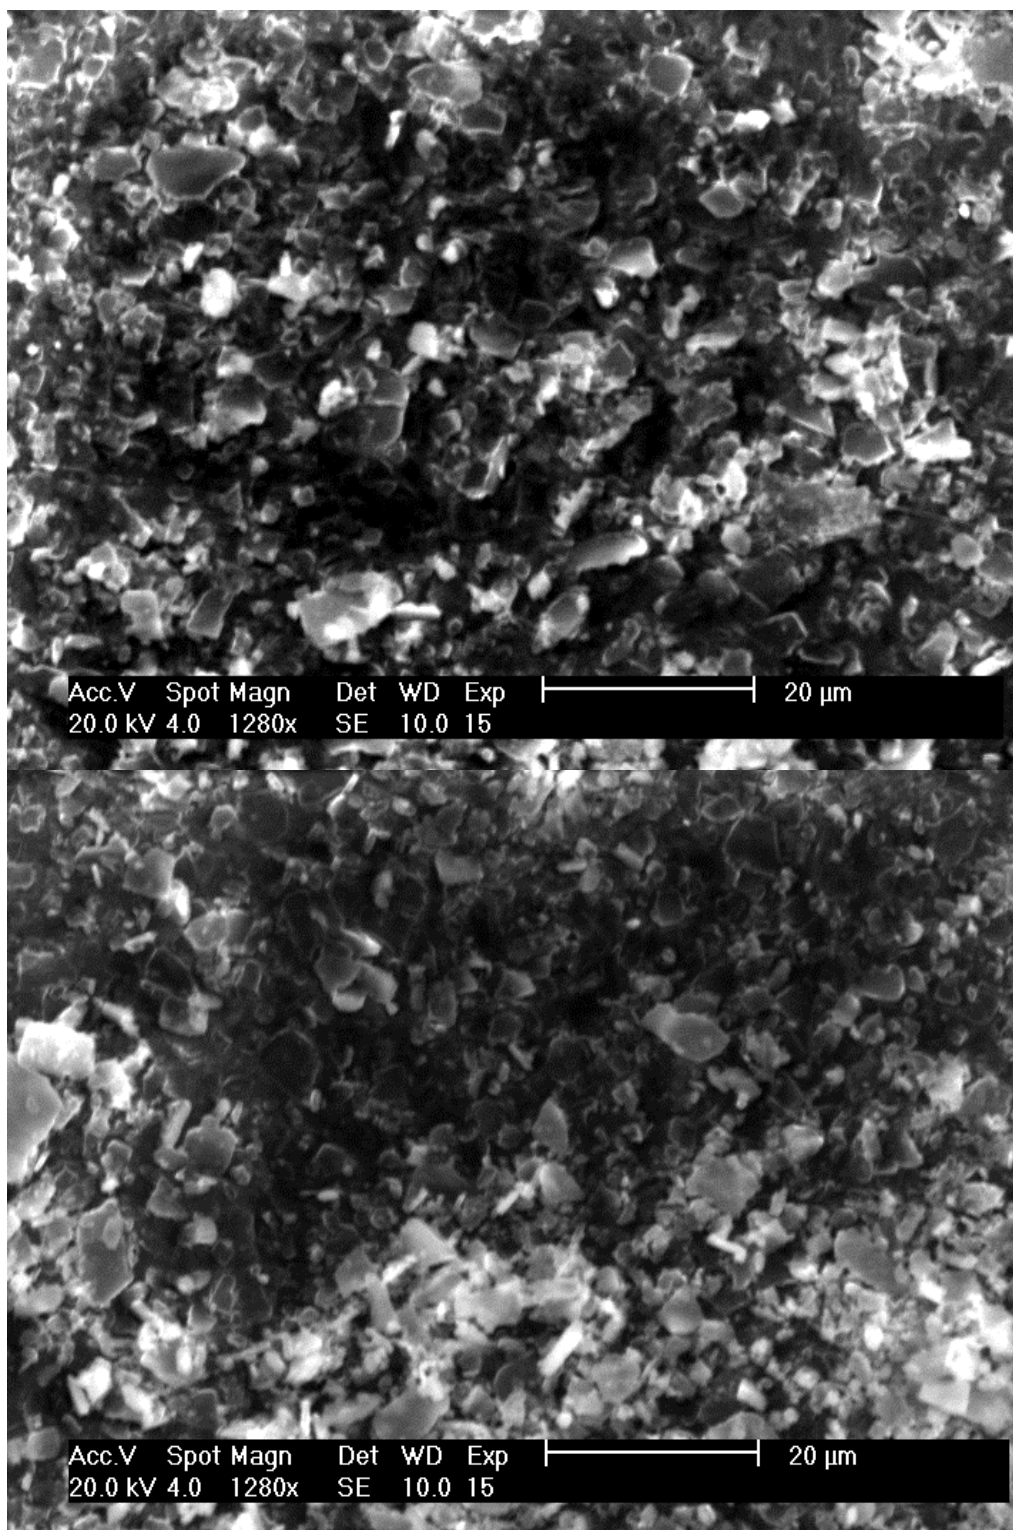

Figure S8: Selected SEM images of the crystals of compound 2.

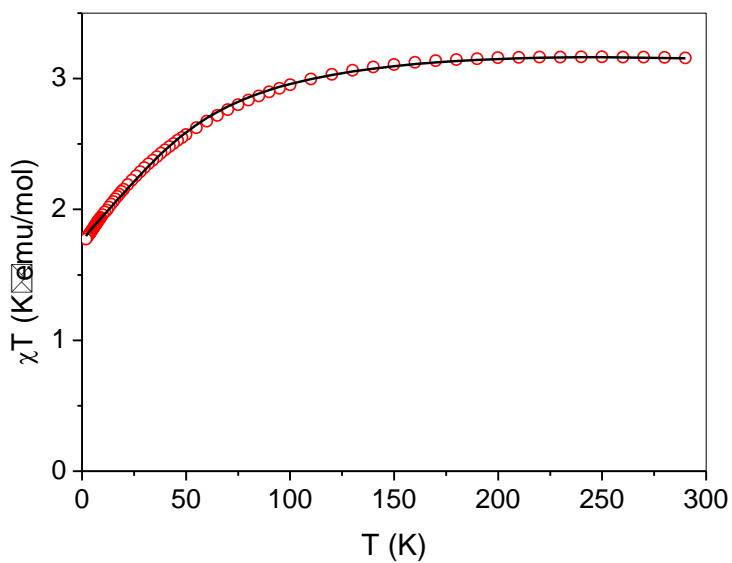

Figure S9. Temperature dependence of  $\chi$  vs.  $T$  (top) and  $\chi T$  vs.  $T$  (bottom) for **1**. The solid line is a fit done by an assumption of the axially distorted octahedral coordination of the Co(II) ion (spin orbit coupling  $\lambda = -100 \pm 3 \text{ cm}^{-1}$ , orbital reduction factor  $\kappa = 1.0 \pm 0.02$ ).

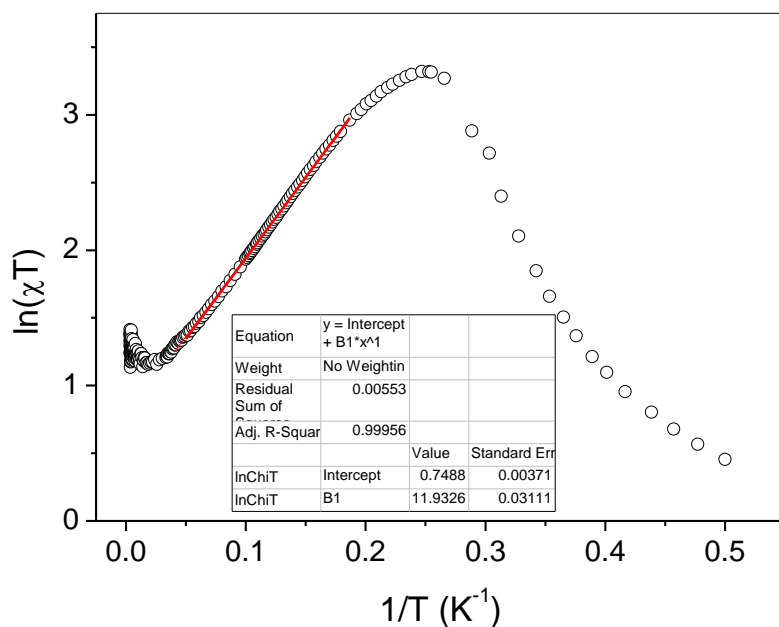

Figure S10:  $\ln(\chi T)$  vs.  $1/T$  dependence for compound **2**.



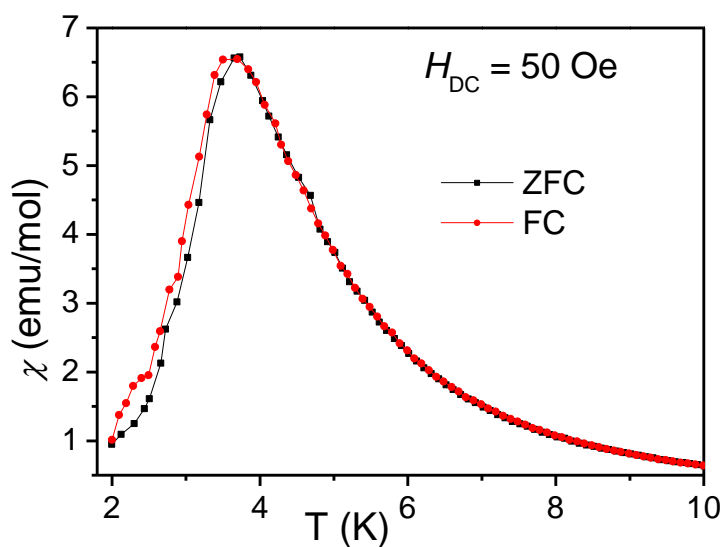

Figure S11. Comparison of  $\chi(T)$  curves registered in FC and ZFC regimes for compound **2**.

Table S3: Fitting results of the AC data for compound **2**.

| T (K) | $\chi_0$ | $\chi_\infty$ | $\tau$ (s) | $\alpha$ | Reduced $\chi_{\text{sqr}}$ |
|-------|----------|---------------|------------|----------|-----------------------------|
| 3.4   | 4.300    | 0.0           | 5.205E-6   | 0.087    | 5.713E-4                    |
| 3.3   | 3.590    | 0.0           | 7.102E-6   | 0.108    | 3.873E-4                    |
| 3.2   | 2.983    | 0.0           | 9.800E-6   | 0.125    | 3.112E-4                    |
| 3.1   | 2.484    | 0.0           | 1.405E-5   | 0.153    | 2.185E-4                    |
| 3.0   | 2.091    | 0.110         | 2.300E-5   | 0.164    | 2.859E-4                    |
| 2.9   | 1.753    | 0.129         | 3.581E-5   | 0.169    | 9.762E-5                    |
| 2.8   | 1.495    | 0.122         | 5.715E-5   | 0.189    | 6.379E-5                    |
| 2.7   | 1.296    | 0.109         | 8.516E-5   | 0.206    | 2.891E-4                    |
| 2.6   | 1.134    | 0.095         | 1.508E-4   | 0.250    | 1.472E-4                    |
| 2.5   | 1.007    | 0.104         | 2.868E-4   | 0.265    | 5.969E-5                    |
| 2.4   | 0.913    | 0.106         | 5.533E-4   | 0.286    | 1.172E-5                    |
| 2.3   | 0.821    | 0.112         | 1.02E-3    | 0.294    | 1.690E-5                    |
| 2.2   | 0.792    | 0.105         | 2.19E-3    | 0.36     | 2.596E-5                    |
| 2.1   | 0.770    | 0.110         | 5.28E-3    | 0.38     | 5.864E-6                    |
| 2.0   | 0.679    | 0.117         | 8.08E-3    | 0.37     | 2.3893E-5                   |
